# Supplementary material
Source: publisher site journal article supplement (http://kjim.org/upload/media/kjim-2023-133-Supplementary-Table-1.pdf)
Supplement: Supplementary file 1 [file kjim-2023-133-Supplementary-Table-1.pdf]

**Supplementary Table 1. Comparison of survey results according to the respondents' affiliations**

| Variable                                                                                   | Affiliation         |                    |                     | p value |
|--------------------------------------------------------------------------------------------|---------------------|--------------------|---------------------|---------|
|                                                                                            | Primary care clinic | Community hospital | University hospital |         |
| Need for antibiotic treatment in uncomplicated diverticulitis (n = 193)                    |                     |                    |                     | 0.260   |
| Yes                                                                                        | 18/21 (85.7)        | 52/55 (94.5)       | 101/117 (86.3)      |         |
| No                                                                                         | 3/21 (14.3)         | 3/55 (5.5)         | 16/117 (13.7)       |         |
| Suggested duration of antibiotic treatment, d (n = 185)                                    |                     |                    |                     | 0.500   |
| ≤ 1                                                                                        | 0/20 (0.0)          | 0/52 (0.0)         | 1/113 (0.9)         |         |
| 2–3                                                                                        | 0/20 (0.0)          | 5/52 (9.6)         | 5/113 (4.4)         |         |
| 4–7                                                                                        | 12/20 (60.0)        | 35/52 (67.3)       | 77/113 (68.1)       |         |
| > 7                                                                                        | 8/20 (40.0)         | 12/52 (23.1)       | 30/113 (26.5)       |         |
| Need for bowel rest in uncomplicated diverticulitis (n = 190)                              |                     |                    |                     | 0.078   |
| Yes                                                                                        | 7/21 (33.3)         | 33/53 (62.3)       | 61/116 (52.6)       |         |
| No                                                                                         | 14/21 (66.7)        | 20/53 (37.7)       | 55/116 (47.4)       |         |
| Need for emergency surgery in diverticulitis with an abscess or microperforation (n = 189) |                     |                    |                     | < 0.001 |
| Yes                                                                                        | 6/20 (30.0)         | 4/53 (7.5)         | 4/116 (3.4)         |         |
| No                                                                                         | 14/20 (70.0)        | 49/53 (92.5)       | 112/116 (96.6)      |         |
| Treatment for recurrent disease (n = 185)                                                  |                     |                    |                     | 0.277   |
| Favor repeated medical treatment                                                           | 6/20 (30.0)         | 13/52 (25.0)       | 23/113 (20.4)       |         |
| Favor surgical treatment                                                                   | 0/20 (0.0)          | 1/52 (1.9)         | 10/113 (8.8)        |         |
| Favor individualized                                                                       | 14/20 (70.0)        | 38/52 (73.1)       | 80/113 (70.8)       |         |
| Elective surgery recommendation for third recurrence (n = 185)                             |                     |                    |                     | 0.056   |
| Yes                                                                                        | 8/20 (40.0)         | 11/52 (21.2)       | 45/113 (39.8)       |         |
| No                                                                                         | 12/20 (60.0)        | 41/52 (78.8)       | 68/113 (60.2)       |         |
| Elective surgery recommendation for fourth recurrence (n = 185)                            |                     |                    |                     | 0.031   |
| Yes                                                                                        | 9/20 (45.0)         | 28/52 (53.8)       | 79/113 (69.9)       |         |
| No                                                                                         | 11/20 (55.0)        | 24/52 (46.2)       | 34/113 (30.1)       |         |

Values are presented with number of responses per total number of respondents (%).
